# Supplementary material
Source: PubMed Central journal article supplement (PMC7787079)
Supplement: mmc3.pdf [file mmc3.pdf]

sFigure 3

**New Orleans (May) ORs**

**Baton Rouge (July) ORs**

Homogeneity of ORs

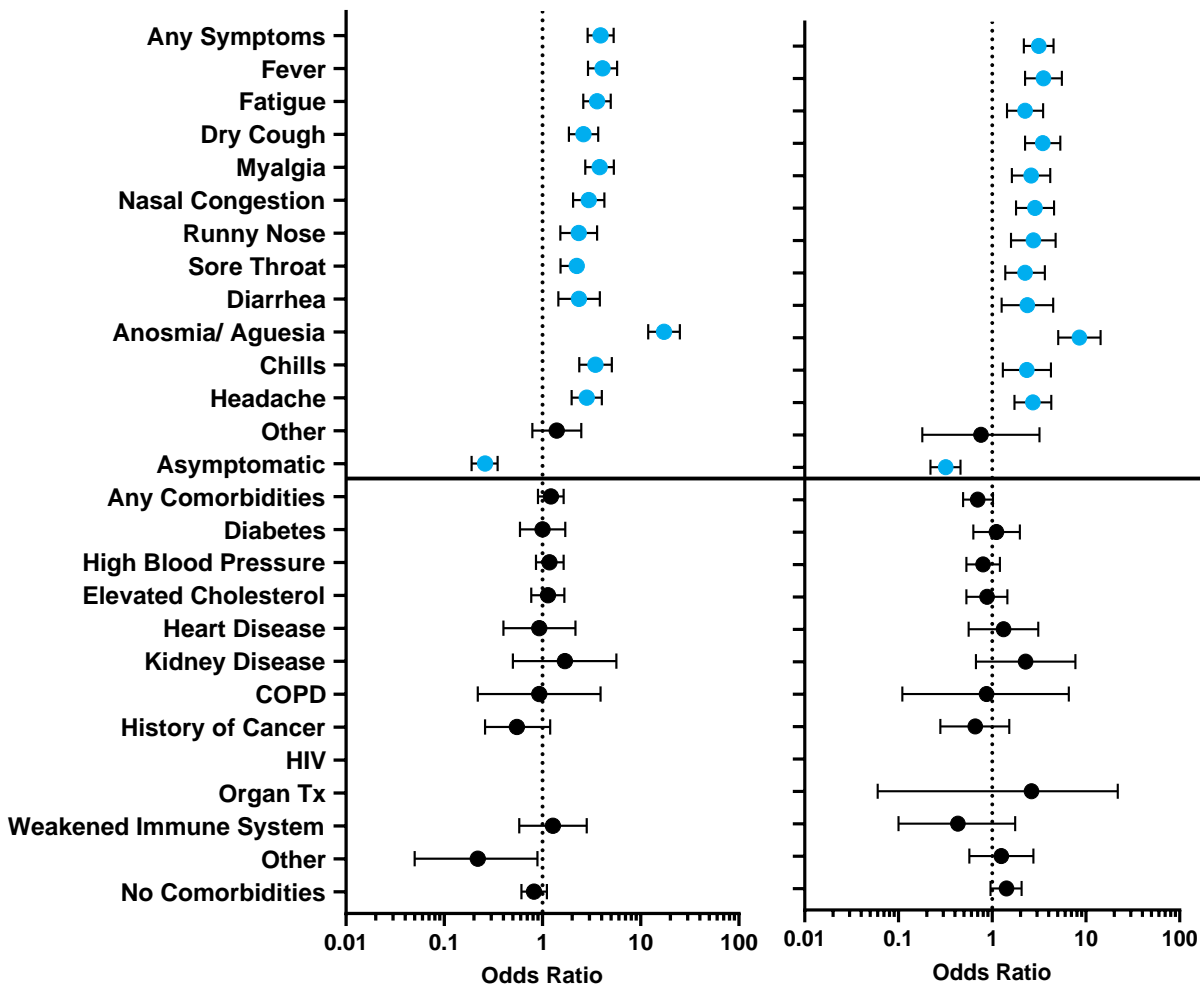

| p value | Factor                 |
|---------|------------------------|
| 0.366   | Any Symptoms           |
| 0.604   | Fever                  |
| 0.090   | Fatigue                |
| 0.323   | Dry Cough              |
| 0.190   | Myalgia                |
| 0.914   | Nasal Congestion       |
| 0.649   | Runny Nose             |
| 0.986   | Sore Throat            |
| 0.989   | Diarrhea               |
| 0.029   | Anosmia/Ageusia        |
| 0.272   | Chills                 |
| 0.897   | Headache               |
| 0.432   | Other                  |
| 0.366   | Asymptomatic           |
| 0.023   | Any Comorbidities      |
| 0.799   | Diabetes               |
| 0.144   | High Blood Pressure    |
| 0.425   | Elevated Cholesterol   |
| 0.568   | Heart Disease          |
| 0.735   | Kidney Disease         |
| 0.962   | COPD                   |
| 0.766   | History of Cancer      |
|         | HIV                    |
| 0.148   | Organ Tx               |
| 0.167   | Weakened Immune System |
| 0.019   | Other                  |
| 0.023   | No Comorbidities       |
