# Supplementary material
Source: PubMed Central journal article supplement (PMC7787079)
Supplement: mmc4.pdf [file mmc4.pdf]

sTable 1

|                             | All<br>n= 311 |      |        |      | Cluster 1<br>n= 191 |      |        |      | Cluster 2<br>n=64 |      |        |      | Cluster 3<br>n=56 |      |        |      | p-value      |
|-----------------------------|---------------|------|--------|------|---------------------|------|--------|------|-------------------|------|--------|------|-------------------|------|--------|------|--------------|
|                             | n             | %    | 95% CI |      | n                   | %    | 95% CI |      | n                 | %    | 95% CI |      | n                 | %    | 95% CI |      |              |
| <b>City (New Orleans)</b>   | 183           | 58.8 | 53.1   | 64.4 | 105                 | 55.0 | 47.6   | 62.2 | 45                | 70.3 | 57.6   | 81.1 | 33                | 58.9 | 45.0   | 71.9 | 0.097        |
| <b>Age (average +/- SD)</b> |               | 47.5 | ± 15.6 |      |                     | 48.2 | ± 16.5 |      |                   | 46.1 | ± 13.6 |      |                   | 46.8 | ± 14.3 |      | 0.110        |
| <b>Parish</b>               |               |      |        |      |                     |      |        |      |                   |      |        |      |                   |      |        |      |              |
| Jefferson                   | 60            | 19.3 | 15.1   | 24.1 | 35                  | 18.3 | 13.1   | 24.6 | 11                | 17.2 | 8.9    | 28.7 | 14                | 25.0 | 14.4   | 38.4 | 0.482        |
| Orleans                     | 123           | 39.5 | 34.1   | 45.2 | 70                  | 36.6 | 29.8   | 43.9 | 34                | 53.1 | 40.2   | 65.7 | 19                | 33.9 | 21.8   | 47.8 | <b>0.041</b> |
| Ascension                   | 13            | 4.2  | 2.2    | 7.0  | 9                   | 4.7  | 2.2    | 8.8  | 3                 | 4.7  | 1.0    | 13.1 | 1                 | 1.8  | 0.0    | 9.6  | 0.671        |
| East Baton Rouge            | 89            | 28.6 | 23.7   | 34.0 | 58                  | 30.4 | 23.9   | 37.4 | 11                | 17.2 | 8.9    | 28.7 | 20                | 35.7 | 23.4   | 49.6 | 0.055        |
| Livingston                  | 24            | 7.7  | 5.0    | 11.3 | 17                  | 8.9  | 5.3    | 13.9 | 5                 | 7.8  | 2.6    | 17.3 | 2                 | 3.6  | 0.4    | 12.3 | 0.413        |
| West Baton Rouge            | 2             | 0.6  | 0.1    | 2.3  | 2                   | 1.0  | 0.1    | 3.7  | 0                 | 0.0  |        |      | 0                 | 0.0  |        |      | 0.746        |
| <b>Sex (Male)</b>           | 104           | 33.4 | 28.2   | 39.0 | 64                  | 33.5 | 26.9   | 40.7 | 17                | 26.6 | 16.3   | 39.1 | 23                | 41.1 | 28.1   | 55.0 | 0.243        |
| <b>Race</b>                 |               |      |        |      |                     |      |        |      |                   |      |        |      |                   |      |        |      |              |
| White                       | 145           | 46.6 | 41.0   | 52.3 | 85                  | 44.5 | 37.3   | 51.9 | 28                | 43.8 | 31.4   | 56.7 | 32                | 57.1 | 43.2   | 70.3 | 0.225        |
| Black                       | 147           | 47.3 | 41.6   | 53.0 | 94                  | 49.2 | 41.9   | 56.5 | 30                | 46.9 | 34.3   | 59.8 | 23                | 41.1 | 28.1   | 55.0 | 0.552        |
| AIAN                        | 1             | 0.3  | 0.0    | 1.8  | 1                   | 0.5  | 0.0    | 2.9  | 0                 | 0.0  | 0.0    | 0.0  | 0                 | 0.0  |        |      | 0.999        |
| Asian                       | 11            | 3.5  | 1.8    | 6.2  | 5                   | 2.6  | 0.9    | 6.0  | 5                 | 7.8  | 2.6    | 17.3 | 1                 | 1.8  | 0.0    | 9.6  | 0.118        |
| NHPI                        | 0             | 0.0  | 0.0    | 0.0  | 0                   | 0.0  |        |      | 0                 | 0.0  |        |      | 0                 | 0.0  |        |      |              |
| Multi-racial                | 6             | 1.9  | 0.7    | 4.2  | 5                   | 2.6  | 0.9    | 6.0  | 1                 | 1.6  | 0.0    | 8.4  | 0                 | 0.0  |        |      | 0.547        |
| Hispanic (any race)         | 32            | 10.3 | 7.1    | 14.2 | 17                  | 8.9  | 5.3    | 13.9 | 3                 | 4.7  | 1.0    | 13.1 | 12                | 21.4 | 11.6   | 34.4 | <b>0.006</b> |
| <b>Comorbidities</b>        |               |      |        |      |                     |      |        |      |                   |      |        |      |                   |      |        |      |              |
| Diabetes                    | 30            | 9.6  | 6.6    | 13.5 | 21                  | 11.0 | 6.9    | 16.3 | 5                 | 7.8  | 2.6    | 17.3 | 4                 | 7.1  | 2.0    | 17.3 | 0.592        |
| High Blood Pressure         | 90            | 28.9 | 24.0   | 34.3 | 57                  | 29.8 | 23.5   | 36.9 | 16                | 25.0 | 15.0   | 37.4 | 17                | 30.4 | 18.8   | 44.1 | 0.746        |
| Elevated Cholesterol        | 53            | 17.0 | 13.0   | 21.7 | 32                  | 16.8 | 11.8   | 22.8 | 9                 | 14.1 | 6.6    | 25.0 | 12                | 21.4 | 11.6   | 34.4 | 0.580        |
| Heart Disease               | 12            | 3.9  | 2.0    | 6.6  | 6                   | 3.1  | 1.2    | 6.7  | 3                 | 4.7  | 1.0    | 13.1 | 3                 | 5.4  | 1.1    | 14.9 | 0.771        |
| Kidney Disease              | 6             | 1.9  | 0.7    | 4.2  | 4                   | 2.1  | 0.6    | 5.3  | 1                 | 1.6  | 0.0    | 8.4  | 1                 | 1.8  | 0.0    | 9.6  | 0.999        |
| COPD                        | 3             | 1.0  | 0.2    | 2.8  | 2                   | 1.0  | 0.1    | 3.7  | 1                 | 1.6  | 0.0    | 8.4  | 0                 | 0.0  |        |      | 0.999        |
| History of Cancer           | 13            | 4.2  | 2.2    | 7.0  | 9                   | 4.7  | 2.2    | 8.8  | 1                 | 1.6  | 0.0    | 8.4  | 3                 | 5.4  | 1.1    | 14.9 | 0.579        |
| HIV                         | 0             | 0.0  |        |      | 0                   | 0.0  |        |      | 0                 | 0.0  |        |      | 0                 | 0.0  |        |      |              |
| Organ Tx                    | 1             | 0.3  | 0.0    | 1.8  | 1                   | 0.5  | 0.0    | 2.9  | 0                 | 0.0  |        |      | 0                 | 0.0  |        |      | 0.999        |
| Weakened immune system      | 9             | 2.9  | 1.3    | 5.4  | 6                   | 3.1  | 1.2    | 6.7  | 2                 | 3.1  | 0.4    | 10.8 | 1                 | 1.8  | 0.0    | 9.6  | 0.907        |
| History of TB               | 0             | 0.0  |        |      | 0                   | 0.0  |        |      | 0                 | 0.0  |        |      | 0                 | 0.0  |        |      |              |
| Other                       | 9             | 2.9  | 1.3    | 5.4  | 3                   | 1.6  | 0.3    | 4.5  | 4                 | 6.3  | 1.7    | 15.2 | 2                 | 3.6  | 0.4    | 12.3 | 0.131        |

|                                           |     |      |       |      |     |      |       |      |    |       |       |      |    |       |       |      |       |
|-------------------------------------------|-----|------|-------|------|-----|------|-------|------|----|-------|-------|------|----|-------|-------|------|-------|
| No Comorbidities                          | 172 | 55.3 | 49.6  | 60.9 | 103 | 53.9 | 46.6  | 61.1 | 39 | 60.9  | 47.9  | 72.9 | 30 | 53.6  | 39.7  | 67.0 | 0.604 |
| <b>Household size</b><br>(average +/- SD) |     | 3.7  | ± 5.4 |      |     | 3.2  | ± 4.2 |      |    | 3.0   | ± 1.6 |      |    | 6.2   | ± 9.6 |      | <.001 |
| <b>Marital</b>                            |     |      |       |      |     |      |       |      |    |       |       |      |    |       |       |      |       |
| Single                                    | 125 | 40.2 | 34.7  | 45.9 | 82  | 42.9 | 35.8  | 50.3 | 23 | 35.9  | 24.3  | 48.9 | 20 | 35.7  | 23.4  | 49.6 | 0.462 |
| Married/Cohabiting                        | 146 | 46.9 | 41.3  | 52.7 | 80  | 41.9 | 34.8  | 49.2 | 37 | 57.8  | 44.8  | 70.1 | 29 | 51.8  | 38.0  | 65.3 | 0.062 |
| Divorced                                  | 25  | 8.0  | 5.3   | 11.6 | 18  | 9.4  | 5.7   | 14.5 | 2  | 3.1   | 0.4   | 10.8 | 5  | 8.9   | 3.0   | 19.6 | 0.255 |
| Widowed                                   | 15  | 4.8  | 2.7   | 7.8  | 11  | 5.8  | 2.9   | 10.1 | 2  | 3.1   | 0.4   | 10.8 | 2  | 3.6   | 0.4   | 12.3 | 0.658 |
| Think you've had COVID                    | 150 | 48.2 | 42.6  | 53.9 | 51  | 26.7 | 20.6  | 33.6 | 56 | 87.5  | 76.8  | 94.4 | 43 | 76.8  | 63.6  | 87.0 | <.001 |
| Family member with COVID                  | 61  | 19.6 | 15.3  | 24.5 | 32  | 16.8 | 11.8  | 22.8 | 13 | 20.3  | 11.3  | 32.2 | 16 | 28.6  | 17.3  | 42.2 | 0.145 |
| <b>Any Symptoms</b>                       | 164 | 52.7 | 47.0  | 58.4 | 44  | 23.0 | 17.3  | 29.7 | 64 | 100.0 |       |      | 56 | 100.0 |       |      | <.001 |
| Fever                                     | 84  | 27.0 | 22.2  | 32.3 | 3   | 1.6  | 0.3   | 4.5  | 43 | 67.2  | 54.3  | 78.4 | 38 | 67.9  | 54.0  | 79.7 | <.001 |
| Fatigue                                   | 95  | 30.5 | 25.5  | 36.0 | 1   | 0.5  | 0.0   | 2.9  | 60 | 93.8  | 84.8  | 98.3 | 34 | 60.7  | 46.8  | 73.5 | <.001 |
| Dry Cough                                 | 82  | 26.4 | 21.6  | 31.6 | 14  | 7.3  | 4.1   | 12.0 | 48 | 75.0  | 62.6  | 85.0 | 20 | 35.7  | 23.4  | 49.6 | <.001 |
| Myalgia                                   | 83  | 26.7 | 21.9  | 32.0 | 3   | 1.6  | 0.3   | 4.5  | 52 | 81.3  | 69.5  | 89.9 | 28 | 50.0  | 36.3  | 63.7 | <.001 |
| Nasal congestion                          | 68  | 21.9 | 17.4  | 26.9 | 7   | 3.7  | 1.5   | 7.4  | 43 | 67.2  | 54.3  | 78.4 | 18 | 32.1  | 20.3  | 46.0 | <.001 |
| Runny nose                                | 45  | 14.5 | 10.8  | 18.9 | 3   | 1.6  | 0.3   | 4.5  | 32 | 50.0  | 37.2  | 62.8 | 10 | 17.9  | 8.9   | 30.4 | <.001 |
| Sore Throat                               | 60  | 19.3 | 15.1  | 24.1 | 10  | 5.2  | 2.5   | 9.4  | 38 | 59.4  | 46.4  | 71.5 | 12 | 21.4  | 11.6  | 34.4 | <.001 |
| Diarrhea                                  | 33  | 10.6 | 7.4   | 14.6 | 3   | 1.6  | 0.3   | 4.5  | 19 | 29.7  | 18.9  | 42.4 | 11 | 19.6  | 10.2  | 32.4 | <.001 |
| Anosmia/dysgeusia                         | 93  | 29.9 | 24.9  | 35.3 | 25  | 13.1 | 8.7   | 18.7 | 43 | 67.2  | 54.3  | 78.4 | 25 | 44.6  | 31.3  | 58.5 | <.001 |
| Chills                                    | 54  | 17.4 | 13.3  | 22.0 | 1   | 0.5  | 0.0   | 2.9  | 44 | 68.8  | 55.9  | 79.8 | 9  | 16.1  | 7.6   | 28.3 | <.001 |
| Headache                                  | 74  | 23.8 | 19.2  | 28.9 | 6   | 3.1  | 1.2   | 6.7  | 54 | 84.4  | 73.1  | 92.2 | 14 | 25.0  | 14.4  | 38.4 | <.001 |
| Other                                     | 16  | 5.1  | 3.0   | 8.2  | 6   | 3.1  | 1.2   | 6.7  | 5  | 7.8   | 2.6   | 17.3 | 5  | 8.9   | 3.0   | 19.6 | 0.132 |
| Cycle Number (average +/- SD)             |     | 22.7 | ± 8.1 |      |     | 23.2 | ± 7.4 |      |    | 22.4  | ± 8.7 |      |    | 20.7  | ± 9.8 |      | 0.589 |
| Signal-to-Calibrator<br>(average +/- SD)  |     | 4.8  | ± 1.9 |      |     | 4.8  | ± 2.0 |      |    | 5.1   | ± 1.7 |      |    | 4.7   | ± 2.0 |      | 0.146 |
| <b>Stage of disease</b>                   |     |      |       |      |     |      |       |      |    |       |       |      |    |       |       |      |       |
| Contagious                                | 85  | 27.3 | 22.5  | 32.6 | 60  | 31.4 | 24.9  | 38.5 | 13 | 20.3  | 11.3  | 32.2 | 12 | 21.4  | 11.6  | 34.4 | 0.132 |
| Recovering                                | 51  | 16.4 | 12.5  | 21.0 | 32  | 16.8 | 11.8  | 22.8 | 9  | 14.1  | 6.6   | 25.0 | 10 | 17.9  | 8.9   | 30.4 | 0.844 |
| Convalescent                              | 175 | 56.3 | 50.6  | 61.9 | 99  | 51.8 | 44.5  | 59.1 | 42 | 65.6  | 52.7  | 77.1 | 34 | 60.7  | 46.8  | 73.5 | 0.119 |
